# Supplementary material
Source: MDPI journal article supplement (https://www.mdpi.com/1099-4300/22/10/1111)

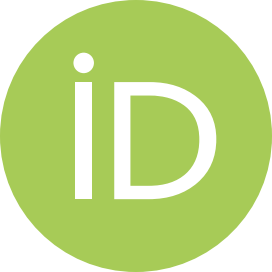

Supplement: s1 [file s1]

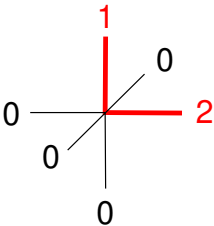

(a)

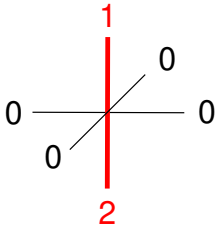

(b)

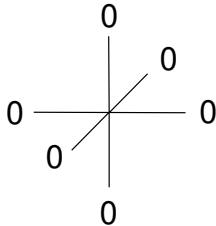

(c)

Supplement: s1 [file s1]
